# Supplementary material for: Cellular organization and molecular differentiation model of breast cancer-associated fibroblasts
Source: PubMed Central journal article supplement (PMC5376683; doi:10.1186/s12943-017-0642-7), 2017-04-03
Supplement: 12943_2017_642_MOESM1_ESM.pdf [file 12943_2017_642_MOESM1_ESM.pdf]

# Additional file 1

## (A) Patient-derived fibroblasts used for single-cell gene expression profiling (T1)

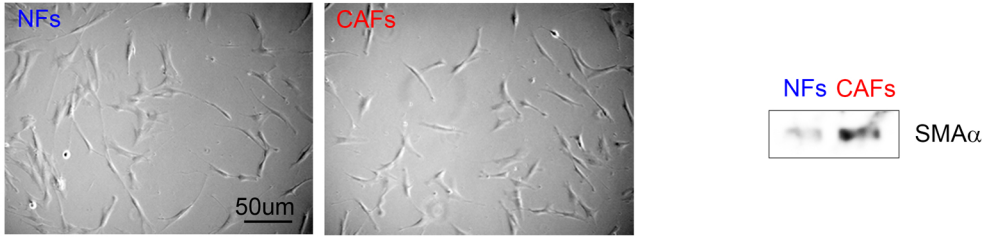

Clinical data:

### Invasive ductal breast carcinoma with associated grade 3 DCIS

Age 42 years  
Tumour size 88 mm  
Vascular invasion yes  
Lymph node involvement no

ER $\alpha$  90%  
PR 30%  
Ki67 70%  
HER2 70%, amplified (SISH)

## (B) Clinical information of all used tumours (T1-T9)

| Tumour | Age (years) | Type          | Size (mm) | VI  | LN    | TILs   | ER $\alpha$ | PR     | Ki67 | HER2      | Molecular subtype |
|--------|-------------|---------------|-----------|-----|-------|--------|-------------|--------|------|-----------|-------------------|
| T1     | 42          | ductal (DCIS) | 88        | yes | 0     | na     | 90%         | 30%    | 70%  | 2+ (ampl) | Luminal B (Her2+) |
| T2     | 79          | lobular       | 79        | no  | 0     | 10-49% | 80%         | 30-50% | 31%  | 3+ (ampl) | Luminal B (Her2+) |
| T3     | 62          | ductal        | 33        | no  | 0     | 1-9%   | 100%        | 80%    | 21%  | 1+        | Luminal A         |
| T4     | 56          | ductal        | 34        | no  | 0     | 1-9%   | 90%         | 80%    | 14%  | 1+        | Luminal A         |
| T5     | 94          | lobular       | 38        | no  | 0     | 1-9%   | 100%        | 100%   | <15% | 0         | Luminal A         |
| T6     | 45          | ductal        | 41        | no  | 0     | >75%   | 0           | 0      | 80%  | 2+        | Her2+             |
| T7     | 81          | ductal        | 39        | yes | 0     | 50-74% | 0           | 0      | 80%  | 2+ (ampl) | Her2+             |
| T8     | 89          | ductal (DCIS) | 75        | no  | 0     | 10-49% | 0           | 0      | 80%  | 0         | Basal             |
| T9     | 83          | ductal        | 59        | yes | 28/32 | 10-49% | 100%        | 90%    | 55%  | 2+ (ampl) | Luminal B (Her2+) |

**Additional file 1. Characterization of patient-derived fibroblasts.** (A) Microscopic image of isolated fibroblast cells (upper left) and western blot of smooth muscle actin-alpha (SMA $\alpha$ ) (upper right). Clinico-pathological parameters and prognostic molecular markers of tumour used for fibroblast isolation and subsequent single-cell gene expression profiling. (Lower panel) (B) Clinical information of all used tumours. (NFs: normal fibroblasts, CAFs: cancer-associated fibroblasts, DCIS: ductal carcinoma *in situ*, ER $\alpha$ : oestrogen receptor, PR: progesterone receptor, HER2: human epidermal growth factor receptor 2, SISH: silver *in situ* hybridization, VI: vascular invasion, LN: lymph node metastasis, TILs: tumour infiltrating lymphocytes, na: data not available, ampl: amplified, HER2 scoring: 0 negative, 1+ also negative, 2+ borderline, 3+ positive)
